# Supplementary material for: Selective binding and fluorescence sensing of Zn(ii)/Cd(ii) using macrocyclic tetra-amines with different fluorophores: insights into the design of selective chemosensors for transition metals
Source: Royal Society of Chemistry journal article supplement (doi:10.1039/d4dt02415j), 2024-12-11
Supplement: d4dt02415j1.pdf [file d4dt02415j1.pdf]

### Electronic Supplementary Information

#### Synthesis of H<sub>2</sub>L4 (4).

A sketch of the synthesis of the receptor is given in Scheme S1. A solution of 2.80 g (14.5 mmol) of 2-(chloromethyl)-8-quinolinol **2** in CH<sub>3</sub>CN (15 mL) was added dropwise to a stirred solution of decahydro-2a,4a,6a,8a-tetraaza-cyclopenta[fg]acenaphthylene **1** (1.13 g, 5.80 mmol) in 15 mL of CH<sub>3</sub>CN at room temperature. The solution was kept under stirring at room temperature for 10 days under a nitrogen atmosphere. Product **3**, as hydrochloride salt, precipitated as a light-yellow powder, which was filtered off, washed with CH<sub>3</sub>CN and used without further purification. The crude product was dissolved in 25 mL of N<sub>2</sub>H<sub>4</sub> and 5 mL of ethanol and the mixture was stirred at 110 °C for 6 hours. After cooling at room temperature, the solvent was evaporated under reduced pressure affording a yellow solid deposit, which was dissolved in NaOH 15 M aqueous solution (10 mL). The resulting solution was extracted with chloroform (4 × 25 mL). The organic layers were collected, dried with Na<sub>2</sub>SO<sub>4</sub> and the solvent was finally removed under vacuum. The crude product was dissolved in ethanol (20 mL), then 48% HBr (1 mL) was added dropwise to the resulting solution, affording the three-hydrobromide salt of H<sub>2</sub>L4 (**4**) as a dark yellow solid. Yield 2.1 g (50%). Elemental analysis for C<sub>28</sub>H<sub>37</sub>Br<sub>3</sub>N<sub>6</sub>O<sub>2</sub>: Calc (Found): C: 46.11 (46.04); H: 5.11 (5.15); N: 11.52 (11.47). <sup>1</sup>H NMR (400MHz, D<sub>2</sub>O): δ (d, J=8 Hz, 2H); 7.31 (d, J = 8 Hz, 2H); 7.25 (t, J = 8 Hz, 2H); 7.11 (d, J = 8 Hz, 2H); 6.84 (d, J = 8 Hz, 2H); 4.33 (s, 4H); 3.50-3.45 (m, 8H); 3.34-3.22 (m, 4H); 3.14-3.00 (m, 4H). <sup>13</sup>C NMR (400MHz, D<sub>2</sub>O): δ 156.9; 150.0; 140.0; 135.0; 128.8; 127.7; 121.2; 119.8; 113.8; 56.5; 50.0; 43.3. ESI-HRMS: [M+H]<sup>+</sup> m/z 487.2805 (calc. for M = C<sub>28</sub>H<sub>34</sub>N<sub>6</sub>O<sub>2</sub>, m/z 486.27); [M+2H]<sup>2+</sup> m/z 244.1441 (calc for M = C<sub>28</sub>H<sub>34</sub>N<sub>6</sub>O<sub>2</sub>, m/z 243.1372)

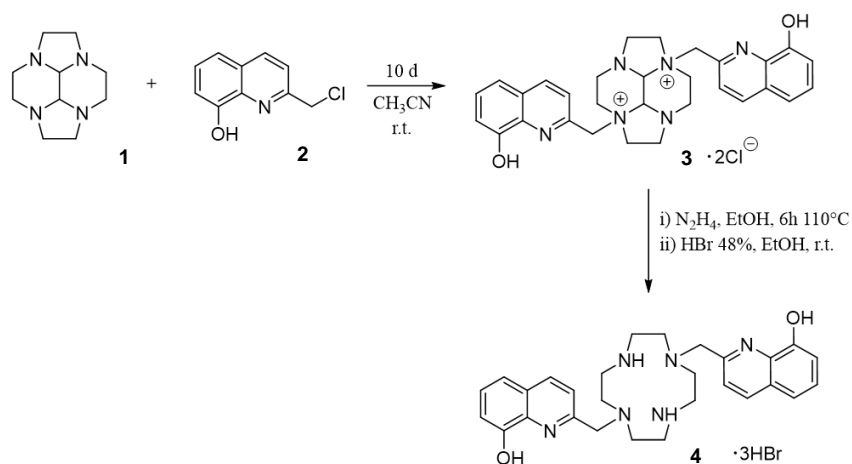

**Synthesis of [CuL1](ClO<sub>4</sub>)<sub>2</sub>·0.5H<sub>2</sub>O.** A solution of Cu(ClO<sub>4</sub>)<sub>2</sub>·6H<sub>2</sub>O (13 mg, 0.05 mmol) in H<sub>2</sub>O (10 mL) was slowly added to a solution of L1 (16 mg, 0.05 mmol) in H<sub>2</sub>O (10 mL). The pH of the solution was adjusted to 7 by addition of a small amount of an aqueous solution of 0.1 M NaOH. Evaporation at room temperature of the resulting solution produced pale blue crystals of [CuL1](ClO<sub>4</sub>)<sub>2</sub>·0.5H<sub>2</sub>O, which were filtered off and dried in a vacuum. Yield 16 mg., 54%. Anal. Elem. calcd for C<sub>18</sub>H<sub>28</sub>Cl<sub>2</sub>N<sub>5</sub>O<sub>8.5</sub>Cu: C, 36.96; H, 4.82; N, 11.97. Found: C, 36.8; H, 5.0; N, 11.9.

**Synthesis of [ZnL3](ClO<sub>4</sub>)<sub>2</sub>·0.5H<sub>2</sub>O.** The complex was obtained by using the method described for [CuL1](ClO<sub>4</sub>)<sub>2</sub>·0.5H<sub>2</sub>O, using as starting compounds Zn(ClO<sub>4</sub>)<sub>2</sub>·6H<sub>2</sub>O (13 mg, 0.05 mmol) and L3 (23 mg, 0.05 mmol, both dissolved in 10 ml of H<sub>2</sub>O. Yield 15 mg., 44%. Anal. Elem. calcd for C<sub>28</sub>H<sub>35</sub>Cl<sub>2</sub>N<sub>6</sub>O<sub>8.5</sub>Zn: C, 46.20; H, 4.84; N, 11.54. Found: C, 46.1; H, 5.0; N, 11.4.

**Synthesis of [CdL3](ClO<sub>4</sub>)<sub>2</sub>·H<sub>2</sub>O.** The complex was obtained by using the method described for [CuL1](ClO<sub>4</sub>)<sub>2</sub>·0.5H<sub>2</sub>O, using as starting compounds Cd(ClO<sub>4</sub>)<sub>2</sub>·6H<sub>2</sub>O (21 mg, 0.05 mmol) and L3 (23 mg, 0.05 mmol, both dissolved in 10 ml of H<sub>2</sub>O. Yield 24 mg., 61%. Anal. Elem. calcd for C<sub>28</sub>H<sub>35</sub>Cl<sub>2</sub>N<sub>6</sub>O<sub>8.5</sub>Zn: C, 42.90; H, 4.62; N, 10.72. Found: C, 42.7; H, 4.8; N, 10.7.

**Synthesis of [Zn(H<sub>2</sub>L4)](ClO<sub>4</sub>)<sub>2</sub>·H<sub>2</sub>O.** The complex was obtained by using the method described for [CuL1](ClO<sub>4</sub>)<sub>2</sub>·0.5H<sub>2</sub>O, using as starting compounds Zn(ClO<sub>4</sub>)<sub>2</sub>·6H<sub>2</sub>O (13 mg, 0.05 mmol) and H<sub>2</sub>L4 (24 mg, 0.05 mmol, both dissolved in 10 ml of H<sub>2</sub>O. Yield 18 mg., 48%. Anal. Elem. calcd for C<sub>28</sub>H<sub>35</sub>Cl<sub>2</sub>N<sub>6</sub>O<sub>11</sub>Zn: C, 43.74; H, 4.72; N, 10.93. Found: C, 43.6; H, 4.8; N, 10.8.

**Synthesis of [Cd(H<sub>2</sub>L4)](ClO<sub>4</sub>)<sub>2</sub>·H<sub>2</sub>O.** The complex was obtained by using the method described for [CuL1](ClO<sub>4</sub>)<sub>2</sub>·0.5H<sub>2</sub>O, using as starting compounds Cd(ClO<sub>4</sub>)<sub>2</sub>·6H<sub>2</sub>O (21 mg, 0.05 mmol) and H<sub>2</sub>L4 (24 mg, 0.05 mmol, both dissolved in 10 ml of H<sub>2</sub>O. Yield 22 mg., 55%. Anal. Elem. calcd for C<sub>28</sub>H<sub>36</sub>Cl<sub>2</sub>N<sub>6</sub>O<sub>11</sub>Cd: C, 41.21; H, 4.44; N, 10.30. Found: C, 41.1; H, 4.6; N, 10.2.

**Synthesis of [Pb(HL4)]ClO<sub>4</sub>·2H<sub>2</sub>O.** The complex was obtained by using the method described for [CuL1](ClO<sub>4</sub>)<sub>2</sub>·0.5H<sub>2</sub>O, using as starting compounds Pb(ClO<sub>4</sub>)<sub>2</sub>·3H<sub>2</sub>O (23 mg, 0.05 mmol) and H<sub>2</sub>L4 (24 mg, 0.05 mmol, both dissolved in 10 ml of H<sub>2</sub>O. Yield 27 mg., 67%. Anal. Elem. calcd for C<sub>28</sub>H<sub>35</sub>ClN<sub>6</sub>O<sub>7</sub>Pb: C, 41.50; H, 4.35; N, 10.37. Found: C, 41.4; H, 4.5; N, 10.3.

**Synthesis of [Ca(ZnL5)<sub>2</sub>](ClO<sub>4</sub>)<sub>2</sub>·14H<sub>2</sub>O.** A solution of Zn(ClO<sub>4</sub>)<sub>2</sub>·6H<sub>2</sub>O (13 mg, 0.05 mmol) in H<sub>2</sub>O (10 mL) was slowly added to a solution of H<sub>2</sub>L5 (29 mg, 0.05 mmol) in H<sub>2</sub>O (10 mL). The pH of the solution was adjusted to 7 by addition of a small amount of an 0.1 M NaOH aqueous solution. CaCl<sub>2</sub> (11 mg, 0.1 mmol) was added and the resulting solution was stirred for 24 h at room temperature. Slow evaporation of the solution produced colourless crystals of [Ca(ZnL5)<sub>2</sub>](ClO<sub>4</sub>)<sub>2</sub>·14H<sub>2</sub>O, which

were filtered off and dried in a vacuum. Yield 23 mg., 55%. Anal. Elem. calcd for C<sub>64</sub>H<sub>98</sub>Cl<sub>2</sub>N<sub>12</sub>O<sub>30</sub>CaZn<sub>2</sub>: C, 43.74; H, 5.62; N, 9.56. Found: C, 43.6; H, 5.8; N, 9.4.

Table S1. Protonation constants of ligands L1-H<sub>2</sub>L5 (298 K, 0.1 M NMe<sub>4</sub>Cl (HL1, L3, H2L4, H2L5) or 0.1 M NaCl (H<sub>2</sub>L2))

| Equilibrium                         | Log K    |
|-------------------------------------|----------|
|                                     |          |
| $L1 + H^+ = [HL1]^+$                | 10.71(5) |
| $[HL1]^+ + H^+ = [H_2L1]^{2+}$      | 8.90(7)  |
| $[H_2L1]^{2+} + H^+ = [H_3L1]^{3+}$ | 2.3(1)   |
|                                     |          |
| $L2^- + H^+ = [HL2]$                | 11.06(6) |
| $[HL2] + H^+ = [HL2]^+$             | 10.54(5) |
| $[H_2L2]^+ + H^+ = [H_3L2]^{2+}$    | 8.85(5)  |
| $[H_3L2]^{2+} + H^+ = [H_4L2]^{3+}$ | 2.88(7)  |
|                                     |          |
| $L3 + H^+ = [HL3]^+$                | 10.54(4) |
| $[HL3]^+ + H^+ = [H_2L3]^{2+}$      | 8.72(6)  |
| $[H_2L3]^{2+} + H^+ = [H_3L3]^{3+}$ | 2.74(8)  |
| $[H_3L3]^{3+} + H^+ = [H_4L3]^{4+}$ | 2.0(1)   |
|                                     |          |
| $L4^{2-} + H^+ = [HL4]^-$           | 11.01(4) |
| $[HL4]^- + H^+ = [H_2L4]$           | 10.66(7) |
| $[H_2L4] + H^+ = [H_3L4]^+$         | 9.90(6)  |
| $[H_3L4]^+ + H^+ = [H_4L4]^{2+}$    | 9.2(1)   |
| $[H_4L4]^{2+} + H^+ = [H_5L4]^{3+}$ | 3.9(1)   |
|                                     |          |
| $L5^{2-} + 2H^+ = [H_2L5]$          | 21.04(6) |
| $[H_2L5] + H^+ = [H_3L5]^+$         | 6.70(7)  |
| $[H_3L5]^+ + H^+ = [H_4L5]^{2+}$    | 6.41(7)  |
| $[H_4L5]^{2+} + H^+ = [H_5L5]^{3+}$ | 4.21(8)  |
| $[H_5L5]^{3+} + H^+ = [H_6L5]^{4+}$ | 3.48(8)  |

**Table S2.** Bond distances and angles defining the metal coordination environment in the [CuL1](ClO<sub>4</sub>)<sub>2</sub>·H<sub>2</sub>O crystal structures.

| <i>Object</i> | <i>Bond Length (Å)</i> |
|---------------|------------------------|
| Cu1-N4        | 2.007(5)               |
| Cu1-N3        | 2.063(4)               |
| Cu1-N2        | 2.015(4)               |
| Cu1-N1        | 2.025(5)               |
| Cu1-N5        | 2.140(4)               |
|               | <i>Angle (deg)</i>     |
| N4-Cu1-N3     | 87.0(2)                |
| N4-Cu1-N2     | 147.4(2)               |
| N4-Cu1-N1     | 86.0(2)                |
| N4-Cu1-N5     | 108.0(2)               |
| N3-Cu1-N2     | 86.1(2)                |
| N3-Cu1-N1     | 151.8(2)               |
| N3-Cu1-N5     | 81.2(1)                |
| N2-Cu1-N1     | 85.2(2)                |
| N2-Cu1-N5     | 102.3(2)               |
| N1-Cu1-N5     | 126.9(2)               |

**Table S3.** Bond distances and angles defining the metal coordination environment in [ZnL3](ClO4)<sub>2</sub>·0.5H<sub>2</sub>O and [CdL3](ClO4)<sub>2</sub>·H<sub>2</sub>O crystal structures.

| <i>Zn</i> | <i>Bond Distances (Å)</i> | <i>Cd</i> | <i>Bond Distances (Å)</i> |
|-----------|---------------------------|-----------|---------------------------|
| Zn1-N1    | 2.192(3)                  | N1-Cd1    | 2.337(2)                  |
| Zn1-N2    | 2.227(3)                  | N2-Cd1    | 2.389(2)                  |
| Zn1-N3    | 2.160(3)                  | N3-Cd1    | 2.357(2)                  |
| Zn1-N4    | 2.222(3)                  | N4-Cd1    | 2.405(2)                  |
| Zn1-N5    | 2.225(3)                  | N5-Cd1    | 2.339(2)                  |
| Zn1-N6    | 2.164(3)                  | N6-Cd1    | 2.350(2)                  |
|           |                           |           |                           |
|           | <i>Angles (deg)</i>       |           | <i>Angles (deg)</i>       |
| N1-Zn1-N2 | 79.1(1)                   | N1-Cd1-N2 | 75.68(6)                  |
| N1-Zn1-N3 | 127.4(1)                  | N1-Cd1-N3 | 118.86(6)                 |
| N1-Zn1-N4 | 81.5(1)                   | N1-Cd1-N4 | 77.14(6)                  |
| N1-Zn1-N5 | 128.8(1)                  | N1-Cd1-N5 | 128.88(6)                 |
| N1-Zn1-N6 | 88.9(1)                   | N1-Cd1-N6 | 94.68(6)                  |
| N2-Zn1-N3 | 81.5(1)                   | N2-Cd1-N3 | 77.10(6)                  |
| N2-Zn1-N4 | 134.9(1)                  | N2-Cd1-N4 | 124.10(6)                 |
| N2-Zn1-N5 | 75.1(1)                   | N2-Cd1-N5 | 71.79(6)                  |
| N2-Zn1-N6 | 143.5(1)                  | N2-Cd1-N6 | 156.86(6)                 |
| N3-Zn1-N4 | 78.7(1)                   | N3-Cd1-N4 | 74.92(6)                  |
| N3-Zn1-N5 | 91.4(1)                   | N3-Cd1-N5 | 90.89(6)                  |
| N3-Zn1-N6 | 131.0(1)                  | N3-Cd1-N6 | 125.44(6)                 |
| N4-Zn1-N5 | 144.9(1)                  | N4-Cd1-N5 | 153.89(6)                 |
| N4-Zn1-N6 | 75.6(1)                   | N4-Cd1-N6 | 72.35(6)                  |
| N5-Zn1-N6 | 86.6(1)                   | N5-Cd1-N6 | 100.09(6)                 |

**Table S4.** Bond distances and angles defining the metal coordination environment in [Zn(H<sub>2</sub>L4)](ClO<sub>4</sub>)<sub>2</sub>·H<sub>2</sub>O, [Cd(H<sub>2</sub>L4)](ClO<sub>4</sub>)<sub>2</sub>·H<sub>2</sub>O, and [Pb(HL4)]ClO<sub>4</sub>·2H<sub>2</sub>O crystal structures.

| <i>Zn</i> | <i>Bond Distances (Å)</i> | <i>Cd</i> | <i>Bond Distances (Å)</i> | <i>Pb</i> | <i>Bond Distances (Å)</i> |
|-----------|---------------------------|-----------|---------------------------|-----------|---------------------------|
| N1-Zn1    | 2.174(8)                  | N1-Cd1    | 2.355(8)                  | N1-Pb1    | 2.768(4)                  |
| N2-Zn1    | 2.243(8)                  | N2-Cd1    | 2.437(8)                  | N2-Pb1    | 2.741(4)                  |
| N3-Zn1    | 2.168(7)                  | N3-Cd1    | 2.392(7)                  | N3-Pb1    | 2.392(4)                  |
| N4-Zn1    | 2.233(8)                  | N4-Cd1    | 2.492(8)                  | N4-Pb1    | 2.712(4)                  |
| N5-Zn1    | 2.243(8)                  | N5-Cd1    | 2.413(7)                  | N6-Pb1    | 2.566(3)                  |
| N6-Zn1    | 2.228(8)                  | N6-Cd1    | 2.370(8)                  | O2-Pb1    | 2.487(3)                  |
|           |                           | O1-Cd1    | 2.707(6)                  |           |                           |
|           |                           | O2-Cd1    | 2.621(6)                  |           |                           |
|           |                           |           |                           |           |                           |
|           | <i>Angles (deg)</i>       |           | <i>Angles (deg)</i>       |           | <i>Angles (deg)</i>       |
| N1-Zn1-N2 | 78.7(3)                   | N1-Cd1-N2 | 75.8(3)                   | N1-Pb1-N2 | 64.1(1)                   |
| N1-Zn1-N3 | 124.4(3)                  | N1-Cd1-N3 | 111.9(3)                  | N1-Pb1-N3 | 86.3(1)                   |
| N1-Zn1-N4 | 80.1(3)                   | N1-Cd1-N4 | 72.4(3)                   | N1-Pb1-N4 | 64.6(1)                   |
| N1-Zn1-N5 | 128.7(3)                  | N1-Cd1-N5 | 86.4(3)                   | N1-Pb1-N6 | 126.8(1)                  |
| N1-Zn1-N6 | 90.0(3)                   | N1-Cd1-N6 | 131.8(3)                  | N1-Pb1-O2 | 158.2(1)                  |
| N2-Zn1-N3 | 80.1(3)                   | N1-Cd1-O1 | 74.1(2)                   | N2-Pb1-N3 | 69.1(1)                   |
| N2-Zn1-N4 | 134.0(3)                  | N1-Cd1-O2 | 158.9(2)                  | N2-Pb1-N4 | 114.9(1)                  |
| N2-Zn1-N5 | 74.5(3)                   | N2-Cd1-N3 | 73.3(3)                   | N2-Pb1-N6 | 144.1(1)                  |
| N2-Zn1-N6 | 145.4(3)                  | N2-Cd1-N4 | 120.4(3)                  | N2-Pb1-O2 | 95.6(1)                   |
| N3-Zn1-N4 | 79.1(3)                   | N2-Cd1-N5 | 68.9(3)                   | N3-Pb1-N4 | 70.4(1)                   |
| N3-Zn1-N5 | 92.9(3)                   | N2-Cd1-N6 | 150.7(3)                  | N3-Pb1-N6 | 77.2(1)                   |
| N3-Zn1-N6 | 131.5(3)                  | N2-Cd1-O1 | 123.3(2)                  | N3-Pb1-O2 | 78.5(1)                   |
| N4-Zn1-N5 | 146.9(3)                  | N2-Cd1-O2 | 92.5(2)                   | N4-Pb1-N6 | 62.3(1)                   |
| N4-Zn1-N6 | 74.2(3)                   | N3-Cd1-N4 | 73.9(3)                   | N4-Pb1-O2 | 123.0(1)                  |
| N5-Zn1-N6 | 88.2(3)                   | N3-Cd1-N5 | 132.0(2)                  | N6-Pb1-O2 | 65.0(1)                   |

|  |  |           |          |  |  |
|--|--|-----------|----------|--|--|
|  |  | N3-Cd1-N6 | 84.9(3)  |  |  |
|  |  | N3-Cd1-O1 | 163.3(2) |  |  |
|  |  | N3-Cd1-O2 | 80.5(2)  |  |  |
|  |  | N4-Cd1-N5 | 152.3(2) |  |  |
|  |  | N4-Cd1-N6 | 69.7(3)  |  |  |
|  |  | N4-Cd1-O1 | 94.0(2)  |  |  |
|  |  | N4-Cd1-O2 | 128.5(2) |  |  |
|  |  | N5-Cd1-N6 | 116.2(2) |  |  |
|  |  | N5-Cd1-O1 | 62.4(2)  |  |  |
|  |  | N5-Cd1-O2 | 72.9(2)  |  |  |
|  |  | N6-Cd1-O1 | 80.0(2)  |  |  |
|  |  | N6-Cd1-O2 | 64.2(2)  |  |  |
|  |  | O1-Cd1-O2 | 99.1(2)  |  |  |

**Table S5.** Bond distances and angles defining the metal coordination environment in the [Ca(ZnL5)<sub>2</sub>](ClO<sub>4</sub>)<sub>2</sub>·14H<sub>2</sub>O crystal structure

| <i>Ca1</i>  | <i>Bond Distances</i><br>(Å) | <i>Zn1A</i>  | <i>Bond Distances</i><br>(Å) | <i>Zn1B</i>  | <i>Bond Distances</i><br>(Å) |
|-------------|------------------------------|--------------|------------------------------|--------------|------------------------------|
| Ca1-O1A     | 2.571(2)                     | Zn1A-N1A     | 2.183(2)                     | Zn1B-N1B     | 2.190(2)                     |
| Ca1-O1B     | 2.600(2)                     | Zn1A-N2A     | 2.248(2)                     | Zn1B-N2B     | 2.186(2)                     |
| Ca1-O2A     | 2.516(2)                     | Zn1A-N3A     | 2.171(2)                     | Zn1B-N3B     | 2.288(2)                     |
| Ca1-O2B     | 2.481(2)                     | Zn1A-N4A     | 2.230(2)                     | Zn1B-N4B     | 2.236(2)                     |
| Ca1-O2W     | 2.375(2)                     | Zn1A-O1A     | 2.043(2)                     | Zn1B-O1B     | 2.111(2)                     |
| Ca1-O3W     | 2.423(2)                     | Zn1A-O3A     | 2.028(2)                     | Zn1B-O3B     | 2.003(2)                     |
| Ca1-O4W     | 2.369(2)                     |              |                              |              |                              |
| Ca1-O5W     | 2.348(2)                     |              |                              |              |                              |
|             | <i>Angles</i><br>(deg)       |              | <i>Angles</i><br>(deg)       |              | <i>Angles</i><br>(deg)       |
| O1A-Ca1-O1B | 151.06(6)                    | N1A-Zn1A-N2A | 81.74(8)                     | N1B-Zn1B-N2B | 82.58(8)                     |
| O1A-Ca1-O2A | 51.12(6)                     | N1A-Zn1A-N3A | 105.99(8)                    | N1B-Zn1B-N3B | 117.87(8)                    |
| O1A-Ca1-O2B | 140.74(6)                    | N1A-Zn1A-N4A | 81.08(8)                     | N1B-Zn1B-N4B | 80.03(8)                     |
| O1A-Ca1-O2W | 74.23(6)                     | N1A-Zn1A-O1A | 81.93(7)                     | N1B-Zn1B-O1B | 77.41(7)                     |
| O1A-Ca1-O3W | 125.76(6)                    | N1A-Zn1A-O3A | 170.80(7)                    | N1B-Zn1B-O3B | 161.36(8)                    |
| O1A-Ca1-O4W | 77.95(6)                     | N2A-Zn1A-N3A | 82.03(8)                     | N2B-Zn1B-N3B | 79.56(8)                     |
| O1A-Ca1-O5W | 85.01(6)                     | N2A-Zn1A-N4A | 152.70(8)                    | N2B-Zn1B-N4B | 142.16(8)                    |
| O1B-Ca1-O2B | 51.37(6)                     | N2A-Zn1A-O1A | 99.30(7)                     | N2B-Zn1B-O1B | 104.15(7)                    |
| O1B-Ca1-O2W | 89.61(6)                     | N2A-Zn1A-O3A | 103.26(7)                    | N2B-Zn1B-O3B | 108.22(7)                    |
| O1B-Ca1-O3W | 76.64(6)                     | N3A-Zn1A-N4A | 82.50(8)                     | N3B-Zn1B-N4B | 79.37(8)                     |
| O1B-Ca1-O4W | 128.16(6)                    | N3A-Zn1A-O1A | 172.08(7)                    | N3B-Zn1B-O1B | 164.72(7)                    |
| O1B-Ca1-O5W | 72.62(6)                     | N3A-Zn1A-O3A | 82.51(7)                     | N3B-Zn1B-O3B | 79.69(7)                     |
| O2A-Ca1-O1B | 134.96(6)                    | N4A-Zn1A-O1A | 99.12(7)                     | N4B-Zn1B-O1B | 104.44(7)                    |
| O2A-Ca1-O2B | 153.00(6)                    | N4A-Zn1A-O3A | 96.86(7)                     | N4B-Zn1B-O3B | 98.44(7)                     |
| O2A-Ca1-O2W | 124.96(6)                    | O1A-Zn1A-O3A | 89.59(7)                     | O1B-Zn1B-O3B | 85.10(7)                     |
| O2A-Ca1-O3W | 77.08(6)                     |              |                              |              |                              |
| O2A-Ca1-O4W | 81.30(6)                     |              |                              |              |                              |
| O2A-Ca1-O5W | 75.78(6)                     |              |                              |              |                              |
| O2B-Ca1-O2W | 75.86(6)                     |              |                              |              |                              |
| O2B-Ca1-O3W | 80.67(6)                     |              |                              |              |                              |



|             |           |  |  |  |  |
|-------------|-----------|--|--|--|--|
| O2B-Ca1-O4W | 79.80(6)  |  |  |  |  |
| O2B-Ca1-O5W | 122.88(7) |  |  |  |  |
| O2W-Ca1-O3W | 156.50(7) |  |  |  |  |
| O2W-Ca1-O4W | 94.75(7)  |  |  |  |  |
| O2W-Ca1-O5W | 95.59(7)  |  |  |  |  |
| O3W-Ca1-O4W | 79.62(7)  |  |  |  |  |
| O3W-Ca1-O5W | 98.27(7)  |  |  |  |  |
| O4W-Ca1-O5W | 156.83(7) |  |  |  |  |

**Table S6.** H-bonds in the [Ca(ZnL5)<sub>2</sub>](ClO<sub>4</sub>)<sub>2</sub>·14H<sub>2</sub>O crystal structure.

| H-Bonded Atoms                                                            | D···A Distance (Å) | H···A Distance (Å) | D-H···A Angle (deg) |
|---------------------------------------------------------------------------|--------------------|--------------------|---------------------|
| <b>Ligand A-cocrystallized solvent molecules</b>                          |                    |                    |                     |
| O1W-H1W2···N5A                                                            | 2.788(3)           | 1.96(2)            | 171(3)              |
| O8W-H8W2···N6A                                                            | 2.796(3)           | 1.98(2)            | 161(3)              |
| O1W-H1W1···O2A                                                            | 2.699(2)           | 1.90(2)            | 159(3)              |
| O2W-H2W2···O3A                                                            | 2.774(2)           | 1.93(2)            | 169(2)              |
| O9W-H9W1···O4A                                                            | 2.726(3)           | 1.88(2)            | 175(3)              |
| <b>Ligand B-cocrystallized solvent molecules</b>                          |                    |                    |                     |
| O6W-H6W1···N5B                                                            | 2.878(3)           | 2.05(2)            | 166(3)              |
| O7W-H7W1···N6B                                                            | 2.974(3)           | 2.14(3)            | 178(3)              |
| O10W-H10W···O2B                                                           | 2.815(4)           | 2.00(4)            | 164(3)              |
| O5W-H5W1···O3B                                                            | 2.763(2)           | 1.94(2)            | 178(3)              |
| O9W-H9W2···O4B                                                            | 2.793(3)           | 1.95(2)            | 172(3)              |
| <b>Perchlorate- cocrystallized solvent molecules</b>                      |                    |                    |                     |
| O11W-H11Y···O21A                                                          | 2.890(7)           | 2.16(3)            | 151(3)              |
| <b>cocrystallized solvent molecules- cocrystallized solvent molecules</b> |                    |                    |                     |
| O2W-H2W1···O7W                                                            | 2.887(3)           | 2.07(3)            | 177(3)              |
| O3W-H3W2···O1W                                                            | 2.879(3)           | 2.09(3)            | 158(3)              |
| O3W-H3W1···O6W                                                            | 2.825(3)           | 1.99(3)            | 170(3)              |
| O4W-H4W2···O1W                                                            | 2.778(3)           | 1.97(2)            | 167(3)              |
| O4W-H4W1···O11W                                                           | 2.771(3)           | 1.94(3)            | 172(3)              |
| O5W-H5W2···O8W                                                            | 2.726(3)           | 1.90(3)            | 166(3)              |
| O6W-H6W2···O12W                                                           | 2.791(4)           | 2.00(3)            | 166(3)              |
| O7W-H7W2···O9W                                                            | 2.740(3)           | 1.88(3)            | 174(3)              |
| O10W-H10Y···O13W                                                          | 2.797(4)           | 2.00(3)            | 162(3)              |
| O11W-H11W···O6W                                                           | 2.919(3)           | 2.11(3)            | 164(3)              |
| O12W-H12Y···O10W                                                          | 2.714(4)           | 1.86(3)            | 167(3)              |
| O12W-H12W···O14W                                                          | 2.711(4)           | 1.87(3)            | 174(3)              |
| O13W-H13W···O7W                                                           | 2.798(4)           | 1.93(4)            | 173(3)              |

**Table S7:** Crystallographic data and refinement parameters for compound **[CuL1](ClO<sub>4</sub>)<sub>2</sub>·H<sub>2</sub>O**, **[ZnL3](ClO<sub>4</sub>)<sub>2</sub>·0.5H<sub>2</sub>O**, **[CdL3](ClO<sub>4</sub>)<sub>2</sub>·H<sub>2</sub>O**, and **[Zn(H<sub>2</sub>L4)](ClO<sub>4</sub>)<sub>2</sub>·H<sub>2</sub>O**

|                                         | <b>[CuL1](ClO<sub>4</sub>)<sub>2</sub>·0.5H<sub>2</sub>O</b>                      | <b>[ZnL3](ClO<sub>4</sub>)<sub>2</sub>·0.5H<sub>2</sub>O</b>                       | <b>[CdL3](ClO<sub>4</sub>)<sub>2</sub>·H<sub>2</sub>O</b>                        | <b>[Zn(H<sub>2</sub>L4)](ClO<sub>4</sub>)<sub>2</sub>·H<sub>2</sub>O</b>          |
|-----------------------------------------|-----------------------------------------------------------------------------------|------------------------------------------------------------------------------------|----------------------------------------------------------------------------------|-----------------------------------------------------------------------------------|
| Empirical formula                       | C <sub>18</sub> H <sub>28</sub> Cl <sub>2</sub> CuN <sub>5</sub> O <sub>8.5</sub> | C <sub>28</sub> H <sub>35</sub> Cl <sub>2</sub> N <sub>6</sub> O <sub>8.5</sub> Zn | C <sub>28</sub> H <sub>36</sub> Cl <sub>2</sub> N <sub>6</sub> O <sub>9</sub> Cd | C <sub>28</sub> H <sub>36</sub> Cl <sub>2</sub> N <sub>6</sub> O <sub>11</sub> Zn |
| Formula weight                          | 584.89                                                                            | 727.89                                                                             | 783.93                                                                           | 768.90                                                                            |
| Temperature (K)                         | 293                                                                               | 150                                                                                | 150                                                                              | 150                                                                               |
| Wavelength (Å)                          | 1.5418                                                                            | 0.71073                                                                            | 0.71073                                                                          | 0.71073                                                                           |
| Crystal system, space group             | Tetragonal, <i>I4<sub>1</sub>/a</i>                                               | Monoclinic, <i>P2<sub>1</sub>/n</i>                                                | Monoclinic, <i>P2<sub>1</sub>/c</i>                                              | Monoclinic, <i>P2<sub>1</sub>/n</i>                                               |
| Unit cell dimensions (Å, °)             | a = b = 17.3117(3)<br>c = 31.2201(7)                                              | a = 10.5259(4)<br>b = 17.3495(6); β = 96.977(3)<br>c = 16.8877(6)                  | a = 8.4798(2)<br>b = 16.0482(4); β = 90.338(2)<br>c = 23.2856(2)                 | a = 10.4810(7)<br>b = 16.939(1); β = 94.523(6)<br>c = 17.697(1)                   |
| Volume (Å <sup>3</sup> )                | 9356.5(4)                                                                         | 3061.18(19)                                                                        | 3168.78(14)                                                                      | 3132.1(3)                                                                         |
| Z, D <sub>c</sub> (mg/cm <sup>3</sup> ) | 16, 1.661                                                                         | 4, 1.579                                                                           | 4, 1.643                                                                         | 4, 1.631                                                                          |
| μ(mm <sup>-1</sup> )                    | 3.939                                                                             | 1.039                                                                              | 0.920                                                                            | 1.026                                                                             |
| F(000)                                  | 4832                                                                              | 1508                                                                               | 1600                                                                             | 1592                                                                              |
| Crystal size (mm)                       | 0.15x0.1x0.1                                                                      | 0.22 x 0.20 x 0.18                                                                 | 0.24 x 0.23 x 0.19                                                               | 0.27 x 0.25 x 0.22                                                                |
| θ range (°)                             | 4.590 – 71.151                                                                    | 4.275 – 29.433                                                                     | 4.192 – 29.137                                                                   | 4.158 – 26.801                                                                    |
| Reflections collected / unique          | 4416 / 4416                                                                       | 24336 / 7298                                                                       | 23329 / 7431                                                                     | 15292 / 5414                                                                      |
| Data / parameters                       | 4416 / 384                                                                        | 7298 / 431                                                                         | 7431 / 442                                                                       | 5414 / 446                                                                        |
| Goodness-of-fit on F <sup>2</sup>       | 1.040                                                                             | 1.070                                                                              | 1.067                                                                            | 1.109                                                                             |
| Final R indices [I>2σ(I)]               | 0.0579 / 0.1477                                                                   | 0.0590 / 0.1326                                                                    | 0.0303 / 0.0662                                                                  | 0.0995 / 0.2377                                                                   |
| R indices (all data)                    | 0.0944 / 0.1766                                                                   | 0.0842 / 0.1448                                                                    | 0.0405 / 0.0695                                                                  | 0.1520 / 0.2647                                                                   |

**Table S8.** Crystallographic data and refinement parameters for compound **[Cd(H<sub>2</sub>L4)](ClO<sub>4</sub>)<sub>2</sub>·H<sub>2</sub>O**, **[Pb(HL4)]ClO<sub>4</sub>·(H<sub>2</sub>O)<sub>2</sub>**, and **[Ca(ZnL5)<sub>2</sub>](ClO<sub>4</sub>)<sub>2</sub>·14H<sub>2</sub>O**.

|                                         | <b>[Cd(H<sub>2</sub>L4)](ClO<sub>4</sub>)<sub>2</sub>·H<sub>2</sub>O</b>          | <b>[Pb(HL4)]ClO<sub>4</sub>·(H<sub>2</sub>O)<sub>2</sub></b>       | <b>[Ca(ZnL5)<sub>2</sub>](ClO<sub>4</sub>)<sub>2</sub>·14H<sub>2</sub>O</b>                       |
|-----------------------------------------|-----------------------------------------------------------------------------------|--------------------------------------------------------------------|---------------------------------------------------------------------------------------------------|
| Empirical formula                       | C <sub>28</sub> H <sub>36</sub> Cl <sub>2</sub> N <sub>6</sub> O <sub>11</sub> Cd | C <sub>28</sub> H <sub>35</sub> ClN <sub>6</sub> O <sub>7</sub> Pb | C <sub>64</sub> H <sub>98</sub> Cl <sub>2</sub> N <sub>12</sub> O <sub>30</sub> CaZn <sub>2</sub> |
| Formula weight                          | 815.93                                                                            | 810.26                                                             | 1757.26                                                                                           |
| Temperature (K)                         | 150                                                                               | 150                                                                | 150                                                                                               |
| Wavelength (Å)                          | 0.71073                                                                           | 0.71073                                                            | 0.71073                                                                                           |
| Crystal system, space group             | Orthorhombic, <i>P2<sub>1</sub>2<sub>1</sub>2<sub>1</sub></i>                     | Monoclinic, <i>P2<sub>1</sub>/n</i>                                | Triclinic, <i>P-1</i>                                                                             |
| Unit cell dimensions (Å, °)             | a = 11.0170(4)<br>b = 14.7346(5)<br>c = 19.6206(8)                                | a = 12.1623(4)<br>b = 16.0748(5); β = 100.065(3)<br>c = 15.0537(5) | a = 12.3537(3); α = 83.534(2)<br>b = 16.8712(4); β = 83.991(2)<br>c = 19.1547(4); γ = 81.834(2)   |
| Volume (Å <sup>3</sup> )                | 3185.0(2)                                                                         | 2897.80(16)                                                        | 3910.64(16)                                                                                       |
| Z, D <sub>c</sub> (mg/cm <sup>3</sup> ) | 4, 1.702                                                                          | 4, 1.854                                                           | 2, 1.492                                                                                          |
| μ(mm <sup>-1</sup> )                    | 0.924                                                                             | 5.972                                                              | 0.837                                                                                             |
| F(000)                                  | 1664                                                                              | 1600                                                               | 1840                                                                                              |
| Crystal size (mm)                       | 0.25 x 0.24 x 0.21                                                                | 0.23 x 0.20 x 0.19                                                 | 0.26 x 0.24 x 0.20                                                                                |
| θ range (°)                             | 4.155 – 26.748                                                                    | 4.167 – 29.371                                                     | 4.120-32.792                                                                                      |
| Reflections collected / unique          | 15908 / 5563                                                                      | 20089 / 6818                                                       | 87992 / 26182                                                                                     |
| Data / parameters                       | 5563 / 445                                                                        | 6818 / 409                                                         | 26182 / 1081                                                                                      |
| Goodness-of-fit on F <sup>2</sup>       | 1.008                                                                             | 1.032                                                              | 1.025                                                                                             |
| Final R indices [I>2σ(I)]               | 0.489 / 0.0845                                                                    | 0.0355 / 0.0671                                                    | 0.0565 / 0.1275                                                                                   |
| R indices (all data)                    | 0.0845 / 0.1035                                                                   | 0.0516 / 0.0744                                                    | 0.0909 / 0.1460                                                                                   |

**Table S9.** Luminescence quantum yield values of free ligands, in the presence of 1.0 eq of Zn(II) and 1.0 eq of Cd(II) at pH 7.

| Ligand            | Quantum Yield |         |         |
|-------------------|---------------|---------|---------|
|                   | 0 eq metal    | 1 eq Zn | 1 eq Cd |
| L1                | 0.0015        | 0.0065  | 0.002   |
| HL2               | 0.0035        | 0.0058  | 0.039   |
| L3                | 0.0016        | 0.022   | 0.0034  |
| H <sub>2</sub> L4 | 0.0031        | 0.0039  | 0.0032  |
| H <sub>2</sub> L5 | 0.0016        | 0.0017  | 0.0018  |

**Table S10.** Molar extinction coefficients of free ligands, in the presence of 1.0 eq of Zn(II) and 1.0 eq of Cd(II). The values have been calculated at the excitation wavelength at pH 7 ( $\lambda = 316$  nm for L1 and L3,  $\lambda = 320$  nm for HL2 and H<sub>2</sub>L4) and, in the case of HL2 and H<sub>2</sub>L4 in correspondence of the maxima of the bands at higher wavelength ( $\lambda = 355$  nm)

|               | Molar extinction coefficient, $\epsilon$ ( $M^{-1} cm^{-1}$ ) |                       |                       |                       |                       |                       |                       |
|---------------|---------------------------------------------------------------|-----------------------|-----------------------|-----------------------|-----------------------|-----------------------|-----------------------|
|               | L1                                                            | HL2                   |                       | L3                    | H <sub>2</sub> L4     |                       | H <sub>2</sub> L5     |
|               | $\lambda = 316$<br>nm                                         | $\lambda = 320$<br>nm | $\lambda = 355$<br>nm | $\lambda = 316$<br>nm | $\lambda = 320$<br>nm | $\lambda = 355$<br>nm | $\lambda = 316$<br>nm |
| 0 eq metal    | 29023                                                         | 8173                  | 1346                  | 47211                 | 2367                  | 800                   | 47402                 |
| 1.0 eq Zn(II) | 43802                                                         | 5671                  | 5519                  | 64998                 | 2071                  | 1667                  | 56041                 |
| 1.0 eq Cd(II) | 29342                                                         | 5385                  | 4769                  | 48014                 | 2433                  | 1733                  | 48037                 |

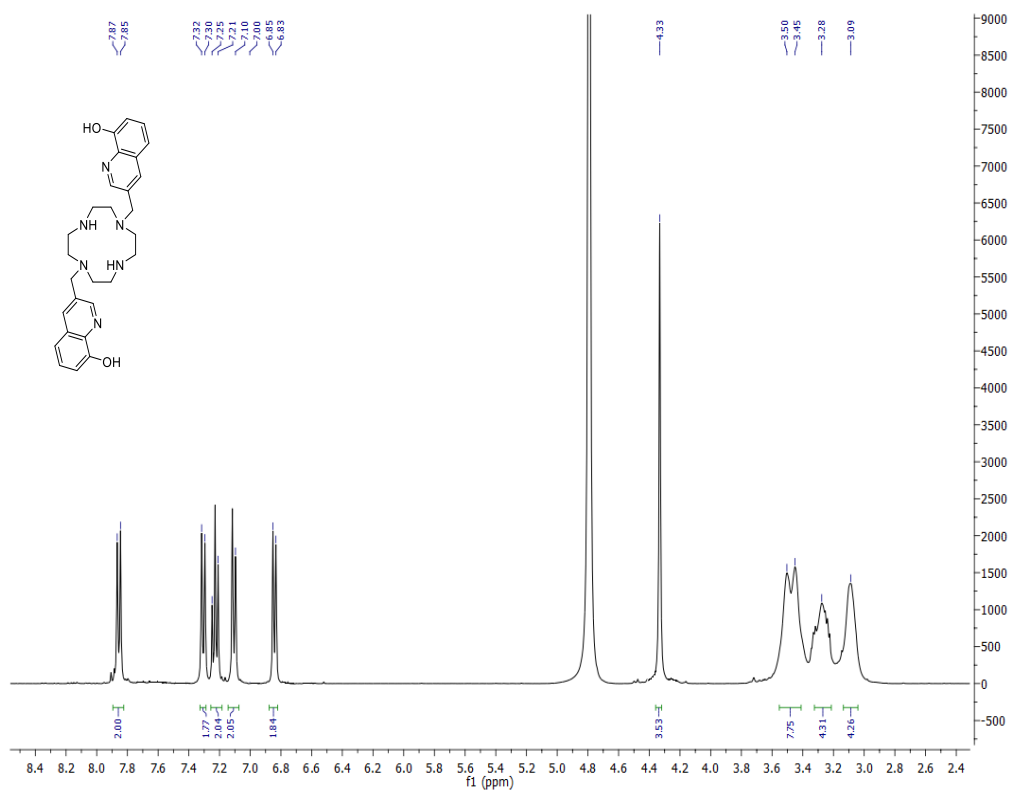

Figure S1. <sup>1</sup>H NMR spectra of H<sub>2</sub>L4 in D<sub>2</sub>O (298 K, 400 MHz)

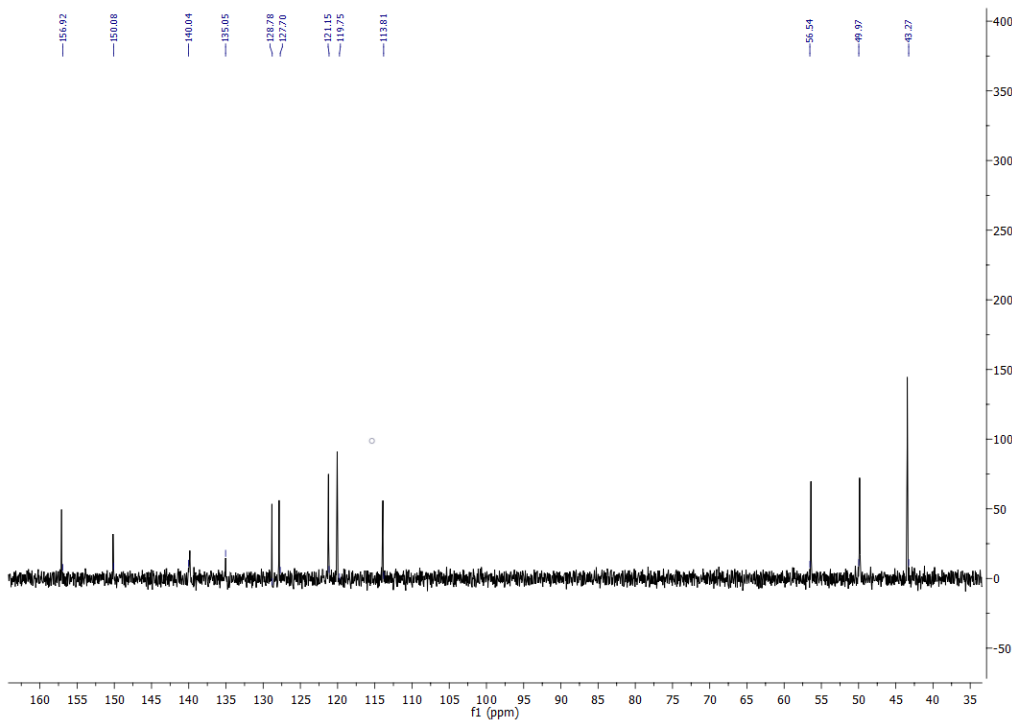

Figure S2. <sup>13</sup>C NMR spectra of H<sub>2</sub>L4 in D<sub>2</sub>O (298 K, 400 MHz)

BIF\_OH\_01 #3-9 RT: 0.04-0.13 AV: 7 NL: 1.62E8  
T: FTMS + p ESI Full ms [150.00-2000.00]

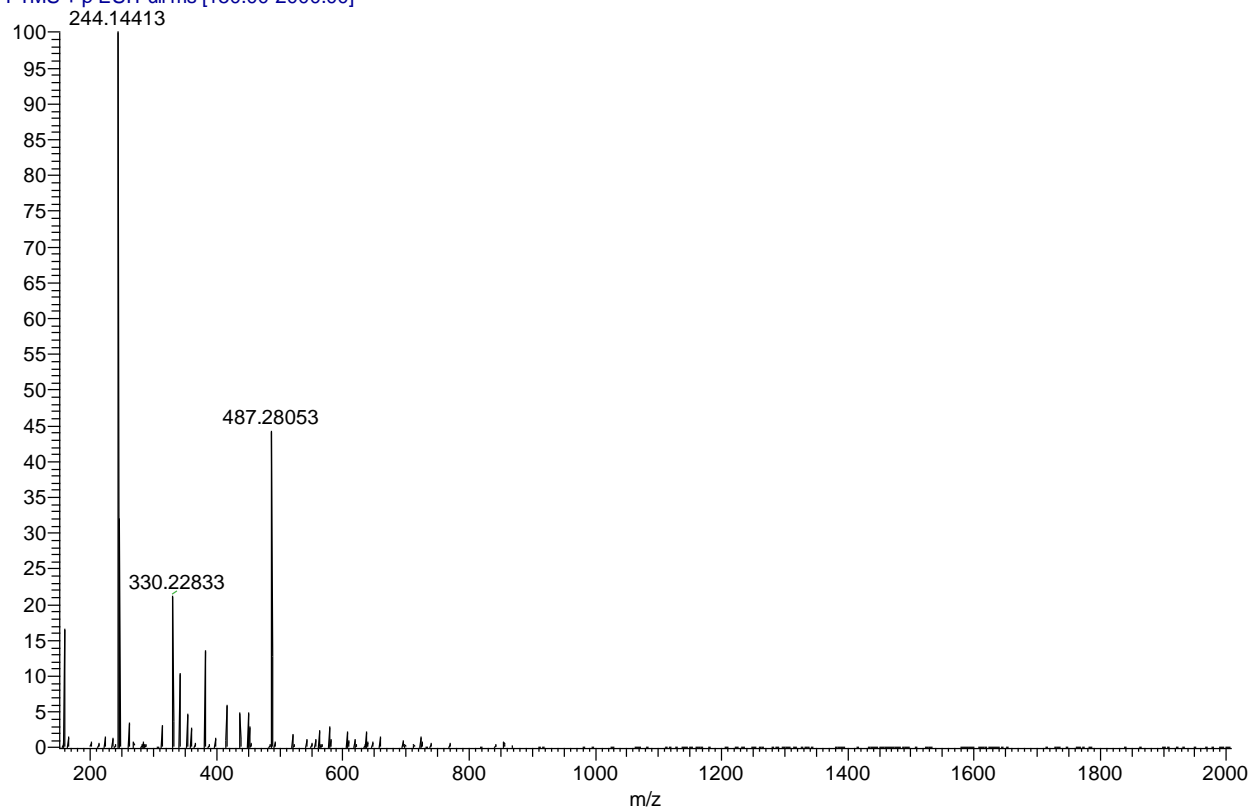

**Figure S3.** High resolution ESI-mass spectrum of H<sub>2</sub>L4

BIF\_OH\_01 #7-10 RT: 0.10-0.14 AV: 4 NL: 7.19E7  
T: FTMS + p ESI Full ms [150.00-2000.00]

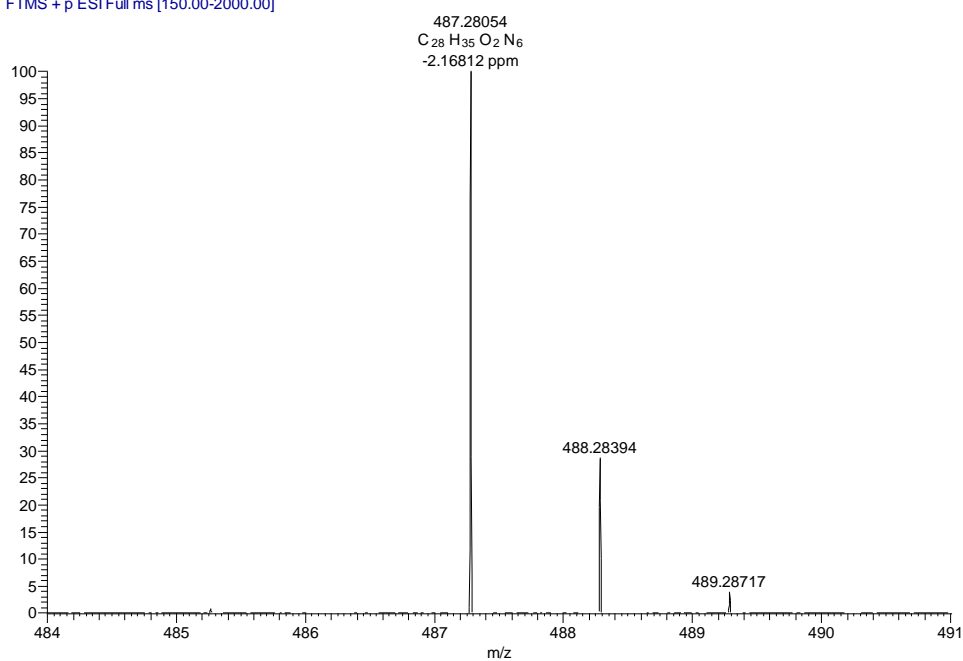

**Figure S4.** Enlargement of the high resolution ESI-mass spectrum of H<sub>2</sub>L4 in the 484-491 m/z range, evidencing the 487 [M+H]<sup>+</sup> peak

BIF\_OH\_01 #7-10 RT: 0.10-0.14 AV: 4 NL: 1.63E8  
T: FTMS + p ESI Full ms [150.00-2000.00]

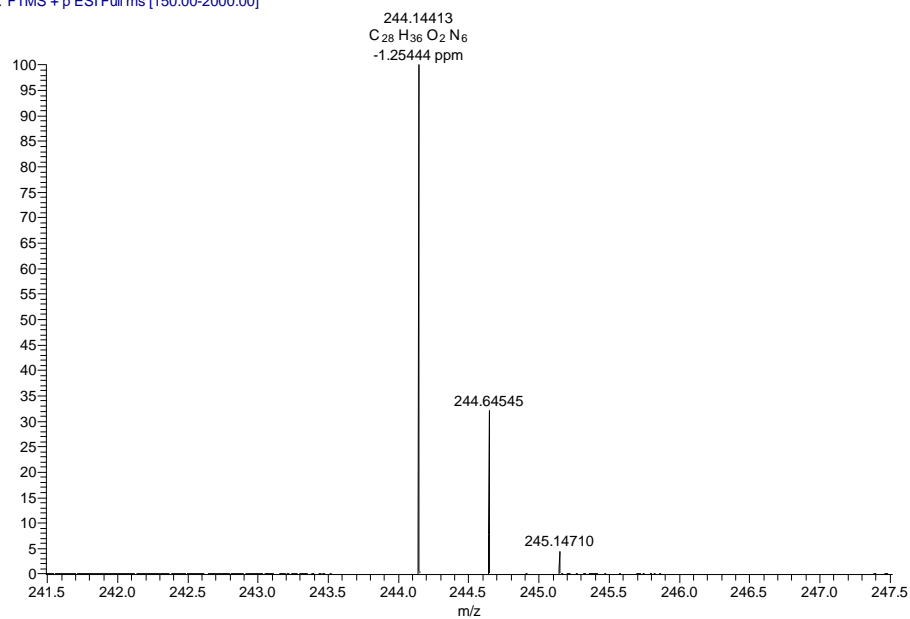

**Figure S5.** Enlargement of the high resolution ESI-mass spectrum of H<sub>2</sub>L4 in the 241.5-247.5 m/z range, evidencing the 244 [M+2H]<sup>2+</sup> peak.



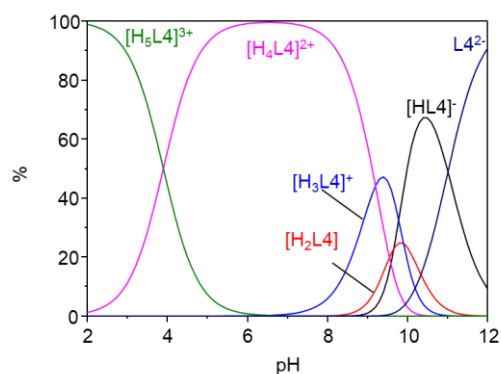

**Figure S6.** Distribution diagrams of the protonated species of H<sub>2</sub>L4 (298 K, 0.1 M NaCl, [H<sub>2</sub>L4] = 1 × 10<sup>-3</sup> M)

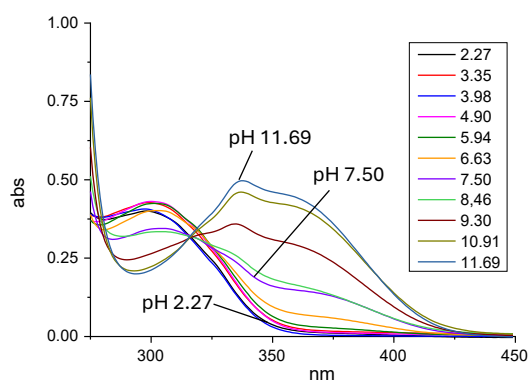

**Figure S7.** UV-vis absorption spectra of H<sub>2</sub>L4 at different pH values ([H<sub>2</sub>L4] = 9.8 × 10<sup>-5</sup>)

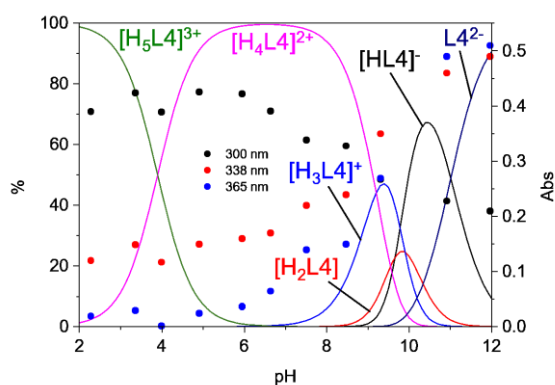

**Figure S8.** Plot of the absorbance at 300 (black circles), 338 (red circles) and 365 (blue circles) nm of H<sub>2</sub>L4 at different pH values superimposed to the distribution diagram of the species present in solution ([H<sub>2</sub>L4] = 9.8 × 10<sup>-5</sup>).

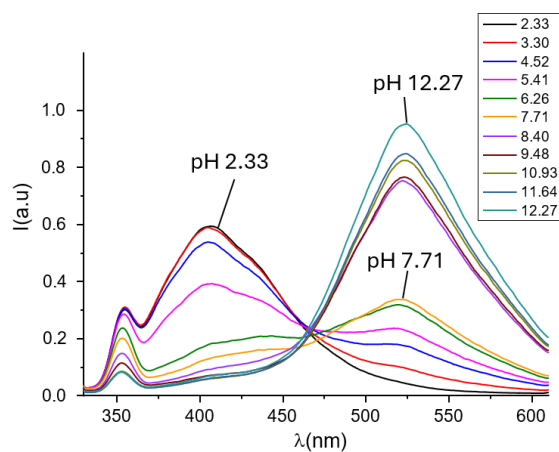

**Figure S9.** Fluorescence emission spectra of H<sub>2</sub>L4 at different pH values ( $[H_2L4] = 2.5 \times 10^{-5}$ ,  $\lambda_{exc} = 320$  nm)

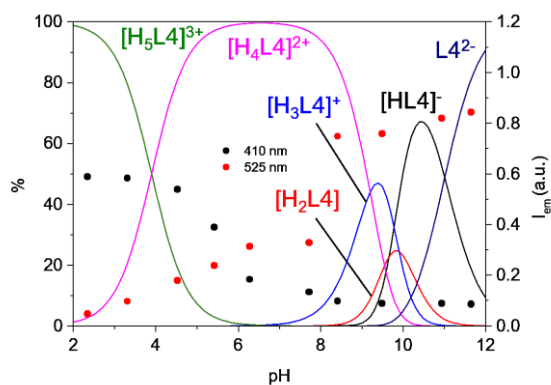

**Figure S10.** Plot of the fluorescence emission at 410 (black circles) and 525 (red circles) of H<sub>2</sub>L4 at different pH values superimposed to the distribution diagram of the species present in solution. ( $[H_2L4] = 2.5 \cdot 10^{-5}$ ,  $\lambda_{exc} = 320$  nm)

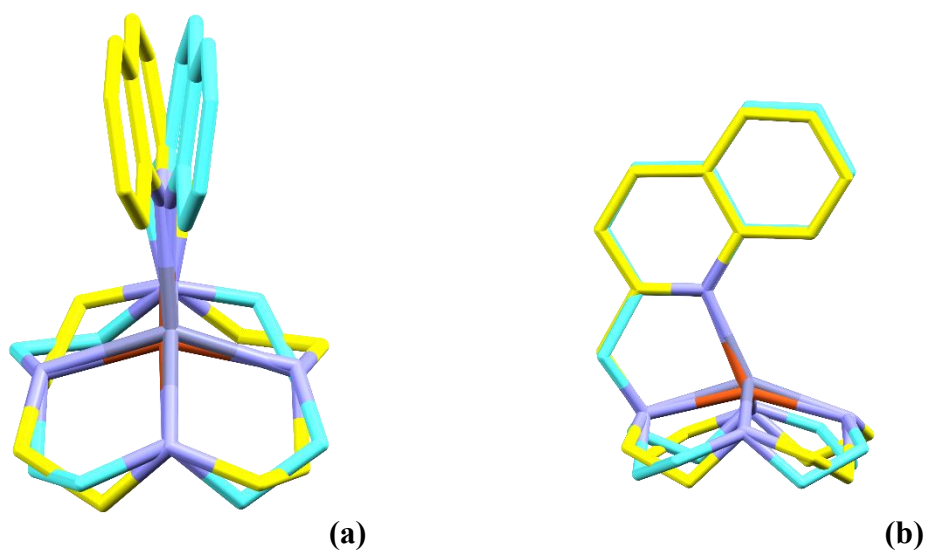

**Figure S11.** Superposition of the  $[ML_1]^{2+}$  complex ( $M = \text{Cu (II)}$  (a) or  $\text{Zn(II)}$  (b)) crystal structures, front and side views, showing strong similarities in the metal coordination. RMS all nitrogens, 0.0827 Å. Yellow carbons belong to the  $\text{Zn(II)}$  complex, cyan ones to the  $\text{Cu(II)}$  one.

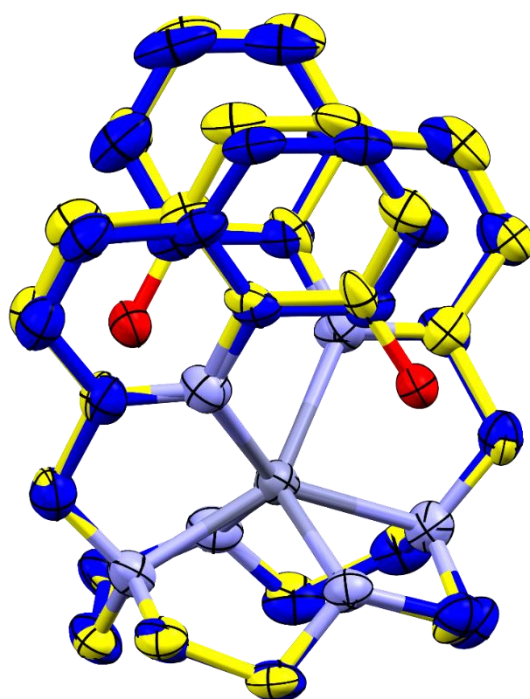

**Figure S12.** View of the superposition of the structures of the  $[\text{ZnL3}]^{2+}$  (blue carbon) and  $[\text{Zn}(\text{H}_2\text{L4})]^{2+}$  (yellow carbon) complexes (4 macrocycle nitrogens superimposed, RMS 0.0326 Å).

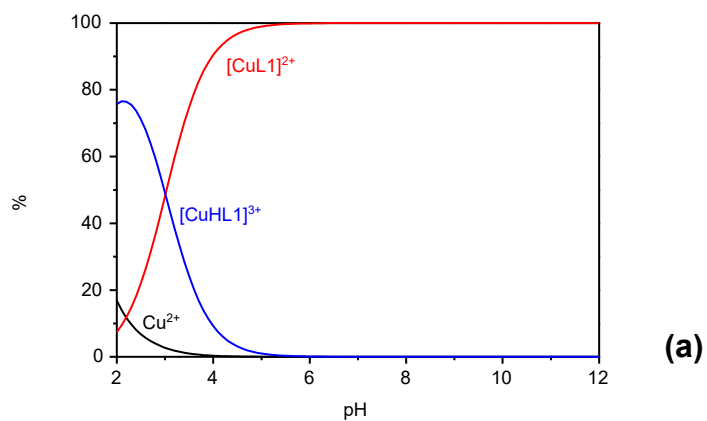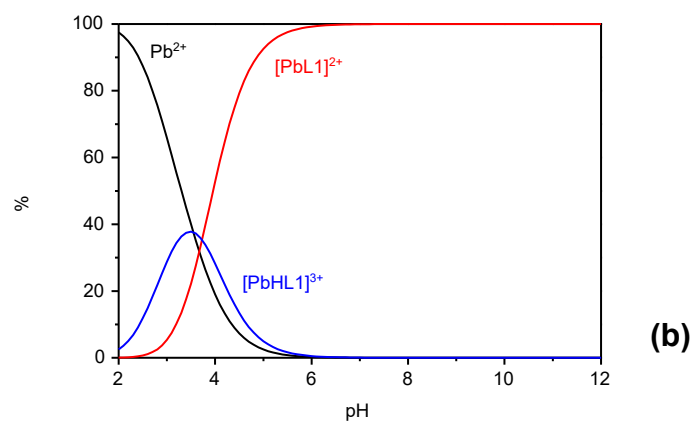

**Figure S13.** Distribution diagrams formed by L1 with Cu(II) (a) and Pb(II) (b) (298 K,  $[\text{L1}] = [\text{M}^{2+}] = 0.001 \text{ M}$ ,  $0.1 \text{ M NaCl}$  aqueous solution).

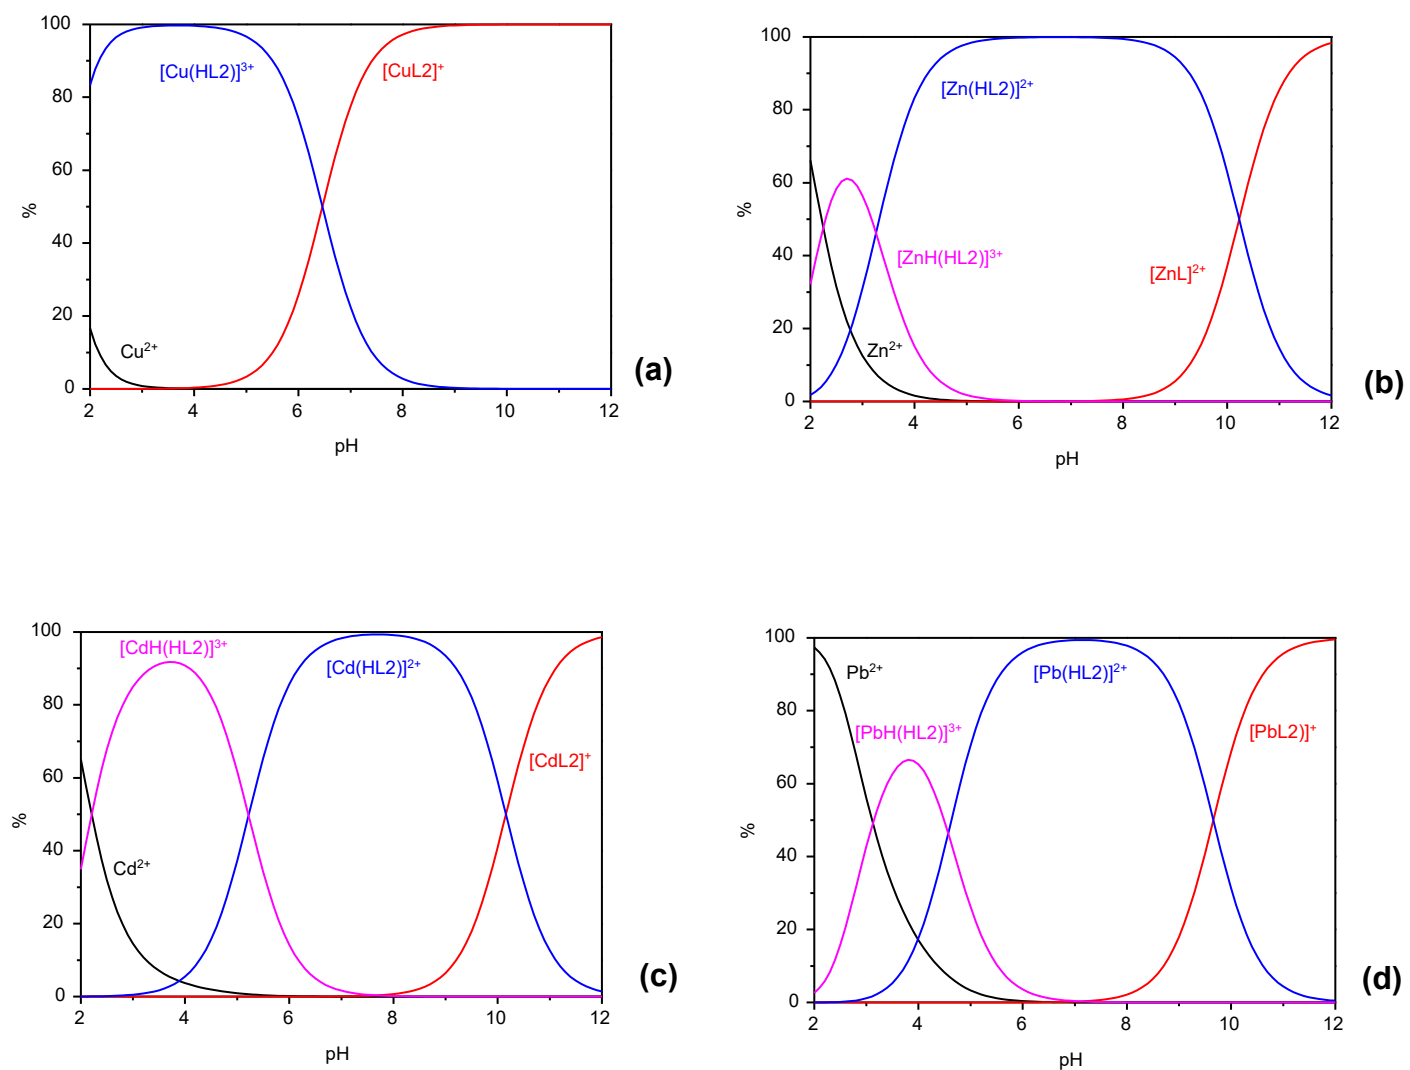

**Figure S14.** Distribution diagrams formed by HL2 with Cu(II) (a) Zn(II) (b), Cd(II) (c) and Pb(II) (d) (298 K,  $[\text{HL}_2] = [\text{M}^{2+}] = 0.001 \text{ M}$ ,  $0.1 \text{ M NaCl}$  aqueous solution).

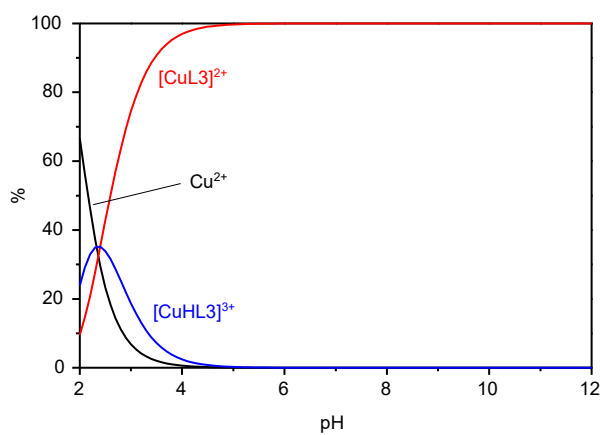

(a)

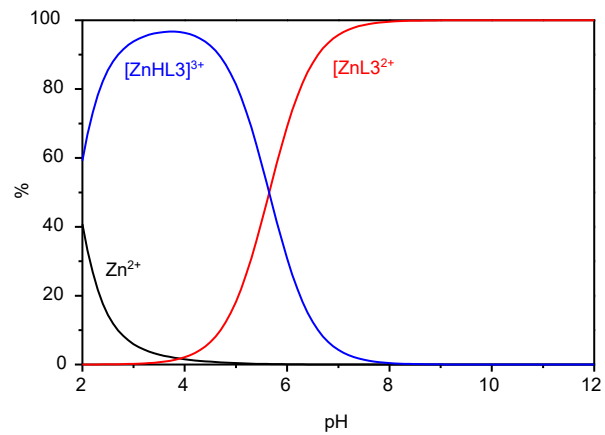

(b)

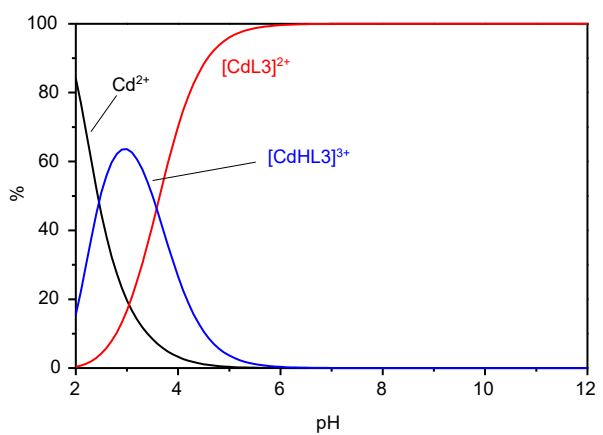

(c)

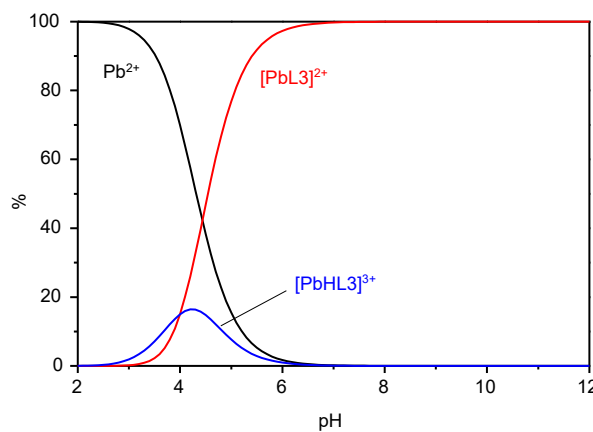

(d)

**Figure S15.** Distribution diagrams formed by L3 with Cu(II) (a) Zn(II) (b), Cd(II) (c) and Pb(II) (d) (298 K,  $[L3] = [M^{2+}] = 0.001$  M, 0.1 M NaCl aqueous solution).

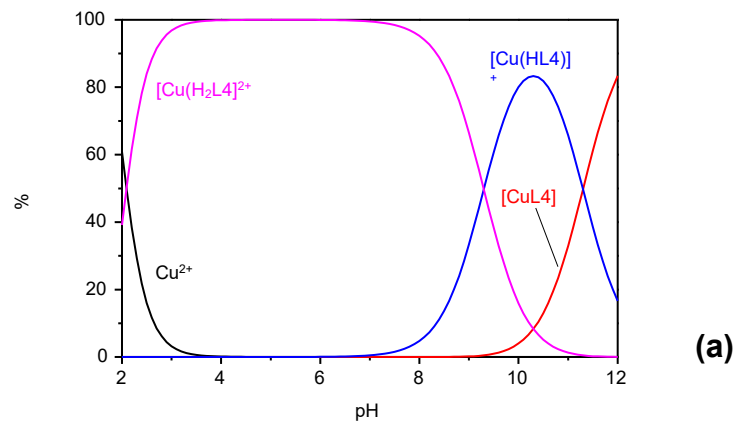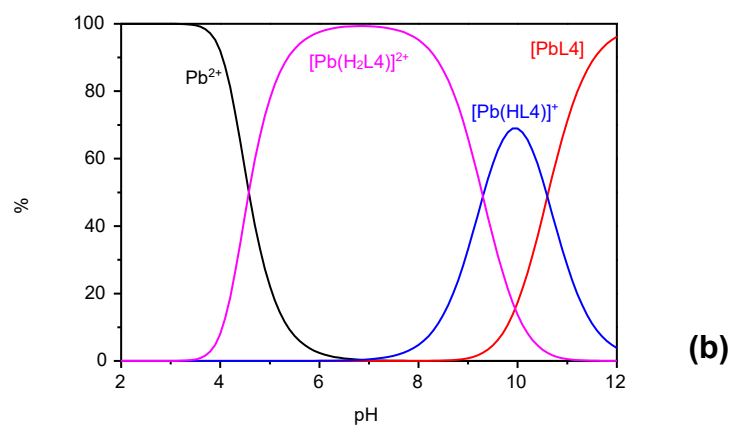

**Figure S16.** Distribution diagrams formed by  $\text{H}_2\text{L}_4$  with  $\text{Cu}(\text{II})$  (a) and  $\text{Pb}(\text{II})$  (b) (298 K,  $[\text{H}_2\text{L}_4] = [\text{M}^{2+}] = 0.001 \text{ M}$ ,  $0.1 \text{ M NaCl}$  aqueous solution).



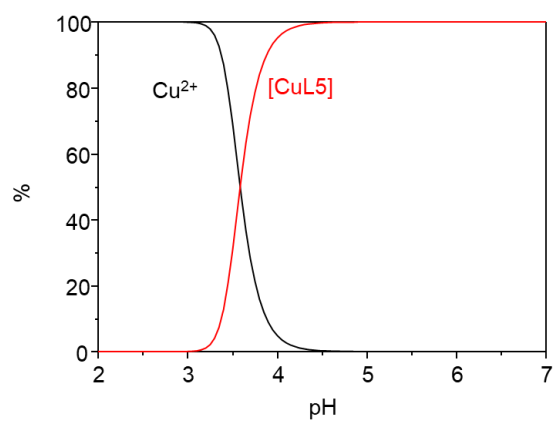

(a)

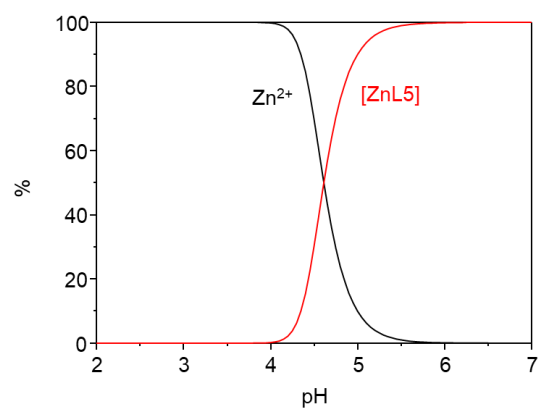

(b)

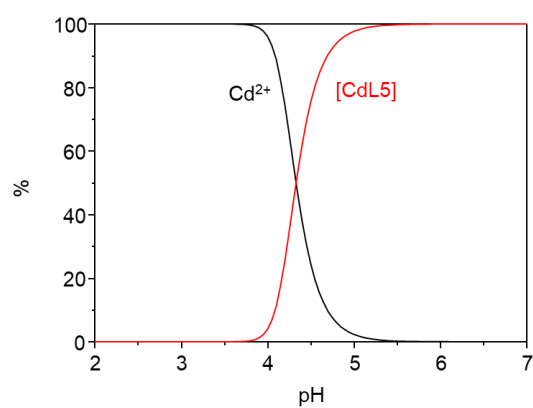

(c)

**Figure S17.** Distribution diagrams formed by  $\text{H}_2\text{L5}$  with  $\text{Cu(II)}$  (a)  $\text{Zn(II)}$  (b) and  $\text{Cd(II)}$  (c) (298 K,  $[\text{H}_2\text{L5}] = [\text{M}^{2+}] = 0.001 \text{ M}$ ,  $0.1 \text{ M NaCl}$  aqueous solution).

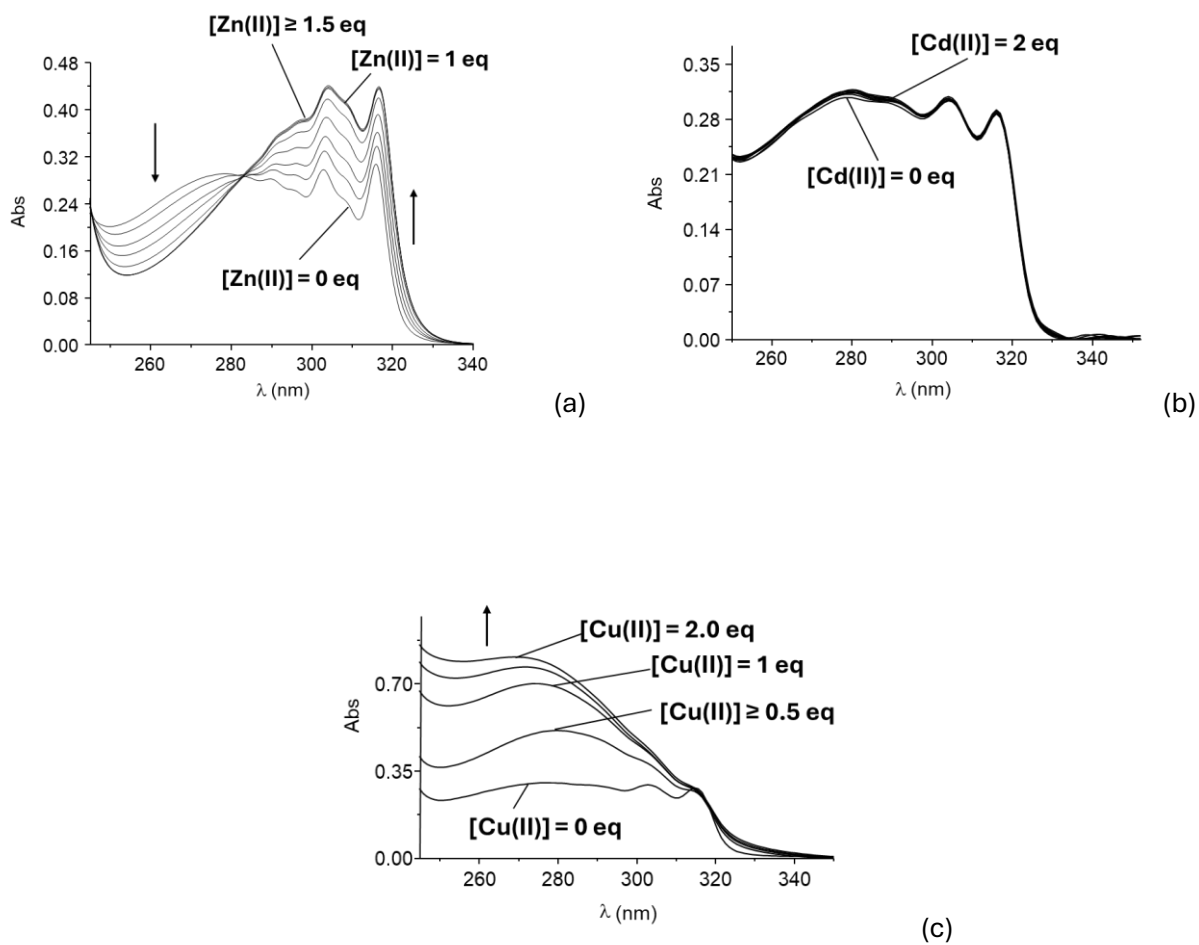

**Figure S18.** Absorption spectra of L1 in the presence of increasing amounts of Zn(II) (a), Cd(II) and Cu(II) (c) (Zn(II) and Cd(II): 0.2 equivs of metal each addition; Cu(II): 0.5 equivs of metal each addition;  $[\text{L1}] = 1 \cdot 10^{-5}$ , TRIS buffer pH 7).

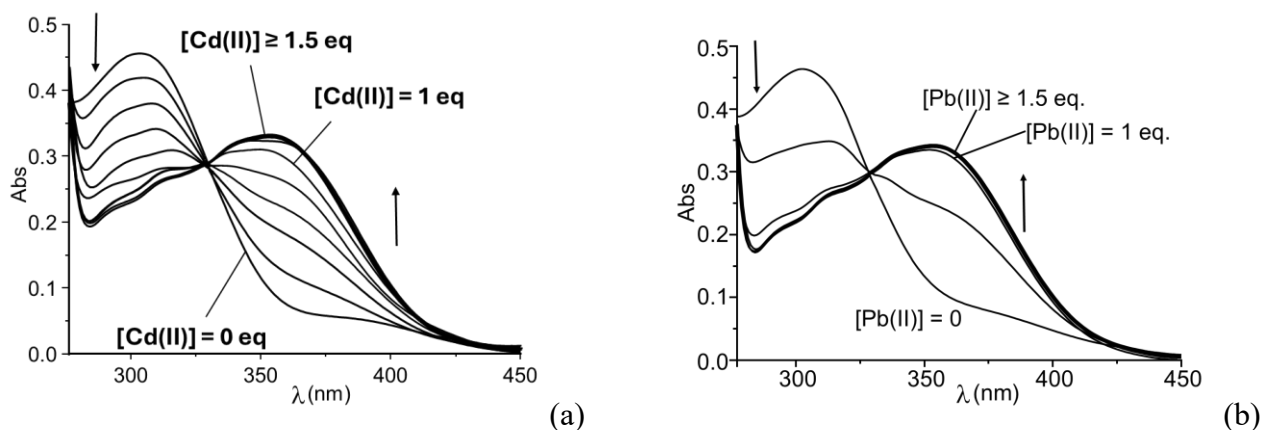

**Figure S19.** Absorption spectra of HL2 in the presence of increasing amounts of Cd(II) (0.2 equivalents each addition) (a) and Pb(II) (c) (0.5 equivalents each addition) (b) ( $[\text{HL2}] = 5.2 \cdot 10^{-5}$ , TRIS buffer pH 7).

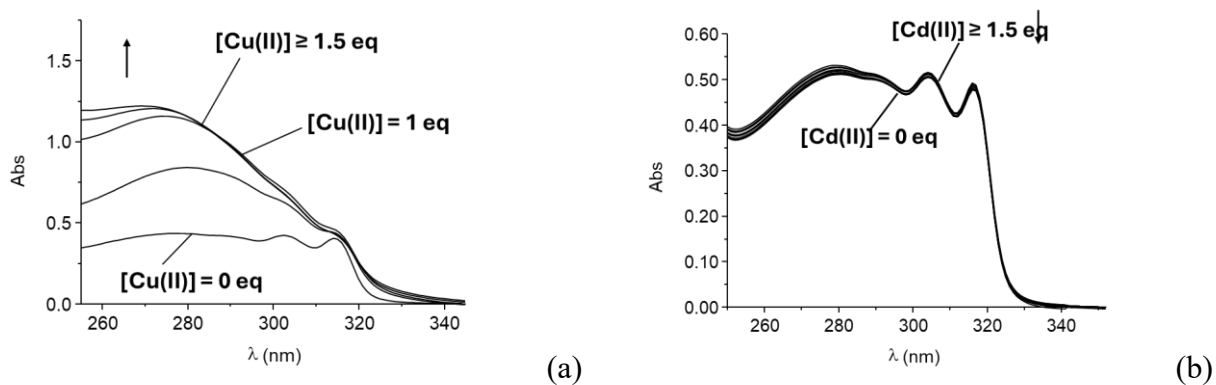

**Figure S20.** Absorption spectra of L3 in the presence of increasing amounts (0.5 equivalents each addition) of Cu(II) (a) and Cd(II) (b) ( $[\text{L3}] = 1 \cdot 10^{-5}$ , TRIS buffer pH 7).

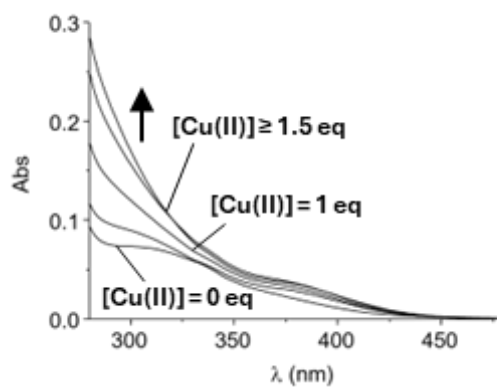

(a)

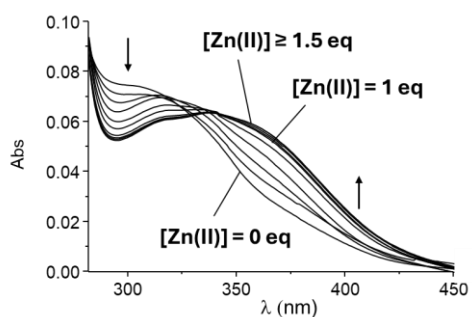

(b)

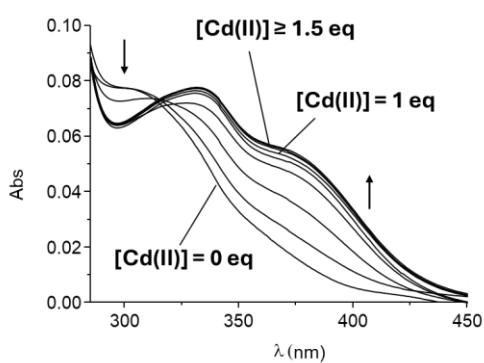

(c)

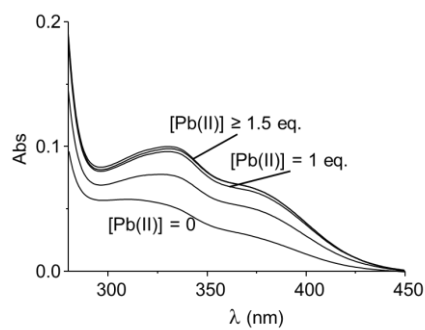

(d)

**Figure S21.** Absorption spectra of H<sub>2</sub>L4 in the presence of increasing amounts (0.5 equivalents each addition) of Cu(II) (0.5 equivalents each addition) (a), Zn(II) (0.2 equivalents each addition) (b), Cd(II) (0.2 equivalents each addition) (c) and Pb(II) (0.5 equivalents each addition) (d) ( $[H_2L4] = 3 \cdot 10^{-5}$ , TRIS buffer pH 7).

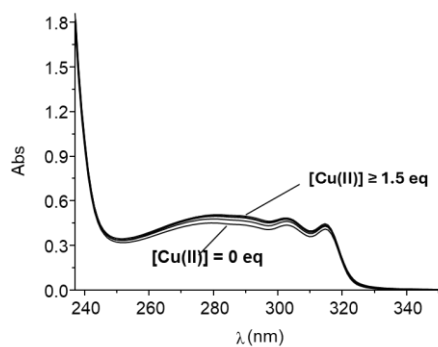

(a)

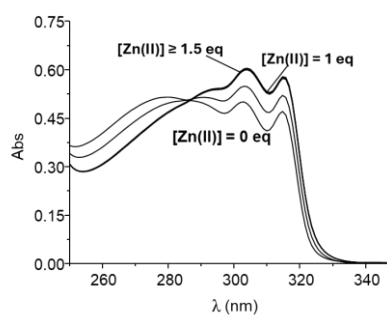

(b)

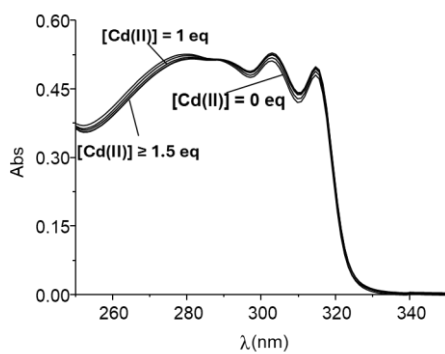

(c)

**Figure S22.** Absorption spectra of H<sub>2</sub>L5 in the presence of increasing amounts (0.5 equivalents each addition) of Cu(II) (a), Zn(II) (b) and Cd(II) (c) ([H<sub>2</sub>L5] = 1·10<sup>-5</sup>, TRIS buffer pH 7).

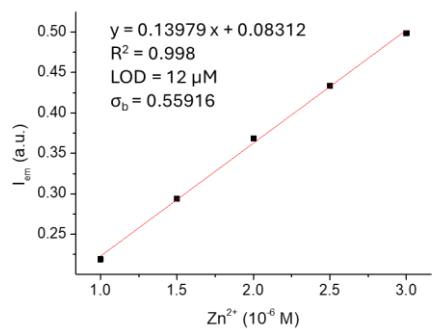

(a)

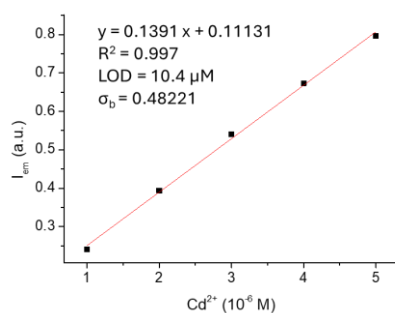

(b)

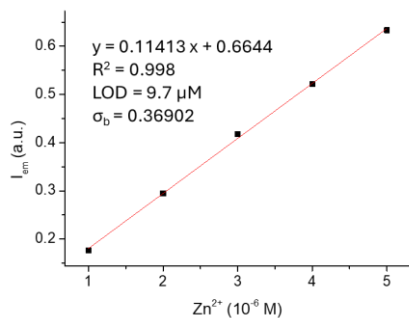

(c)

**Figure S23.** Plots relative to the determination of LODs of (a) Zn(II) by L1 (S/N = 534, [L1] 1 · 10<sup>-5</sup> M), (b) Cd(II) by HL2 (S/N = 642, [HL2] = 1 · 10<sup>-5</sup> M) and (c) Zn(II) by L3 (S/N = 693, [L3] = 1 · 10<sup>-5</sup> M).
